# Supplementary material for: Use of argon to measure gas exchange in turbulent mountain streams
Source: Copernicus journal article supplement (doi:10.5194/bg-15-3085-2018), 2018-05-18
Supplement: Supplementary file [file bg-15-3085-2018-supplement-title-page.pdf › bg-15-3085-2018-supplement-title-page.pdf]

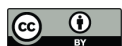

## *Supplement of*

# **Use of argon to measure gas exchange in turbulent mountain streams**

**Robert O. Hall Jr. and Hilary L. Madinger**

*Correspondence to:* Robert O. Hall Jr. ([bob.hall@flbs.umt.edu](mailto:bob.hall@flbs.umt.edu))

- [bg-15-3085-2018-supplement-title-page.pdf](#)
- Argon supplement
  - .DS\_Store
  - Arcode.html
  - ardata copy.csv
  - sf6data copy.csv

The copyright of individual parts of the supplement might differ from the CC BY 4.0 License.
